# Supplementary material
Source: Springer Nature journal article supplement (https://www.springermedizin.de/resource/supplementary/12889_2011_4353_MOESM3_ESM.pdf/9491848)
Supplement: MOESM3 [file 9491848]

Identification

Records identified through database searching (n=147)

Additional records identified through other sources (n=7)

Screening

Records screened (n = 154)

Records excluded based on title and abstract (n= 110)

Eligibility

Full text articles assessed for eligibility (n = 44)

Full text articles excluded (n=25)

- Commentaries/reviews n=10
- Crash injury not study outcome n=3
- High income population n=11
- Duplicate study n=1

Included

Studies included in qualitative synthesis (n = 19)
